# Supplementary material for: On a simplified solution of climate-carbon dynamics in idealized flat10MIP simulations
Source: Copernicus journal article supplement (doi:10.5194/egusphere-2025-3270), 2025-07-16
Supplement: Supplementary file [file egusphere-2025-3270-RC1-supplement.pdf]

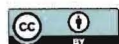

# On a simplified solution of climate-carbon dynamics in idealized flat10MIP simulations

Victor Brovkin<sup>1,2</sup>, Benjamin M. Sanderson<sup>3</sup>, Noel G. Brizuela<sup>1</sup>, Tomohiro Hajima<sup>4</sup>, Tatiana Ilyina<sup>1,2,5</sup>, Chris D. Jones<sup>6,7</sup>, Charles Koven<sup>8</sup>, David Lawrence<sup>9</sup>, Peter Lawrence<sup>9</sup>, Hongmei Li<sup>1,5</sup>, Spencer Liddcoat<sup>6</sup>, Anastasia Romanou<sup>10,11</sup>, Roland Séférian<sup>12</sup>, Lori T. Sentman<sup>13</sup>, Abigail L. S. Swann<sup>14</sup>, Jerry Tjiputra<sup>15</sup>, Tilo Ziehn<sup>16</sup>, and Alexander J. Winkler<sup>1,17</sup>

<sup>1</sup>Max Planck Institute for Meteorology, Hamburg, Germany

<sup>2</sup>University of Hamburg, Hamburg, Germany

<sup>3</sup>CICERO Center for International Climate Research, Oslo, Norway

<sup>4</sup>Japan Agency for Marine-Earth Science and Technology, Yokohama, Japan

<sup>5</sup>Helmholtz-Zentrum Hereon, Geesthacht, Germany

<sup>6</sup>Met Office Hadley Centre, Exeter, UK

<sup>7</sup>School of Geographical Sciences, University of Bristol, Bristol, UK

<sup>8</sup>Lawrence Berkeley National Laboratory, Berkeley, CA, USA

<sup>9</sup>NSF National Center for Atmospheric Research (NCAR), Boulder, CO, USA

<sup>10</sup>NASA Goddard Institute for Space Studies, New York, NY, USA

<sup>11</sup>Applied Physics and Applied Mathematics, Columbia University, New York, NY, USA

<sup>12</sup>Centre National de Recherches Météorologiques (CNRM), Toulouse, France

<sup>13</sup>NOAA/OAR Geophysical Fluid Dynamics Laboratory, Princeton, NJ, USA

<sup>14</sup>University of Washington, Seattle, WA, USA

<sup>15</sup>NORCE Norwegian Research Centre, Bjerknes Centre for Climate Research, Bergen, Norway

<sup>16</sup>CSIRO Environment, Aspendale, Australia

<sup>17</sup>Max Planck Institute for Biogeochemistry, Jena, Germany

**Correspondence:** Victor Brovkin (victor.brovkin@mpimet.mpg.de)

**Abstract.** Idealized experiments with coupled climate-carbon Earth system models (ESMs) provide a basis for understanding the response of the carbon cycle to external forcing and for quantifying climate-carbon feedbacks. Here, we analyze globally-averaged results from idealized esm-flat10 experiments and show that most models exhibit a quasi-linear relationship between cumulative carbon uptake on land and in the ocean during a period of constant fossil fuel emissions of 10 PgC/yr.

5 We hypothesize that this relationship does not depend on emission pathways. Further, as a simplification, we quantify the relationship between cumulative ocean carbon uptake and changes in ocean heat content using a linear approximation. In this way, changes in oceanic heat content and atmospheric CO<sub>2</sub> concentration become interdependent variables, reducing the coupled temperature-CO<sub>2</sub> system to just one differential equation. The equation can be solved analytically or numerically for the atmospheric CO<sub>2</sub> concentration as a function of fossil fuel emissions. This approach leads to a simplified description of global  
10 carbon and climate dynamics, which could be used for applications beyond existing analytical frameworks.

## 1 Introduction

The relationship between climate change and carbon emissions has been extensively studied (Cox et al., 2000; Friedlingstein et al., 2006; Matthews and Zickfeld, 2012; Williams et al., 2016; Jones and Friedlingstein, 2020). The framework of idealized experiments of the Coupled Climate–Carbon Cycle Model Intercomparison Project (C4MIP) (Jones et al., 2016) allowed the climate-carbon feedback (Arora et al., 2020) to be quantified in the Coupled Model Intercomparison Project phase 6 (CMIP6) while experiments in the Zero Emissions Commitment Model Intercomparison Project (ZECMIP) helped to assess the zero-emission climate commitment (Jones et al., 2019; MacDougall et al., 2020). Recently, 'flat10' Model Intercomparison (flat10MIP) experiments (Sanderson et al., 2024a) were conducted with a suite of ESMs to assess the carbon-climate dynamics relevant to mitigation (Sanderson et al., 2024b). The core experiment in flat10MIP, esm-flat10, was designed to assess the response of temperature change and land/ocean carbon dynamics as a function of cumulative emissions. <sup>In this</sup> The scenario of constant emissions of 10 PgC/year <sup>a constant</sup> was continuing for 100 years with the expectation of a near-linear increase in global temperature according to the concept of Transient Climate Response to cumulative CO<sub>2</sub> Emissions (TCRE; Canadell et al., 2021). Here we <sup>evaluate</sup> use the results of the flat10MIP experiments to <sup>against a simple</sup> simplify the energy and carbon budget of the coupled climate-carbon system. <sup>from participating models</sup>

These idealized climate-carbon experiments differ from historical CMIP6 experiments, where historical forcings such as emissions of aerosols, non-CO<sub>2</sub> greenhouse gases and land-use changes were used for model evaluation against observed global and regional climate changes and atmospheric CO<sub>2</sub> concentrations. Historical simulations were performed and compared using both concentration- and emission-driven approaches (Hajima et al., 2025). For the carbon budget, historical simulations of ESMs were evaluated against observed atmospheric CO<sub>2</sub> concentration and results from stand-alone land and ocean carbon models <sup>emissions-driven simulation</sup> performed within the Global Carbon Project (GCP; Friedlingstein et al., 2023). Idealized experiments cannot be directly evaluated against observations; however, they are very useful in understanding the role of different climate and carbon processes and the timescales of their dynamics. <sup>reword: Models performed simulations as part of CMIP6. Hajima et al compared them.</sup>

The global energy balance of the climate system is a useful framework for analyzing climate models and observations (Forster et al., 2021; Gregory et al., 2024). Energy balance models assume that the Earth's annual energy budget was in equilibrium in the pre-industrial <sup>era</sup> state, i.e., solar energy reaching the Earth was fully compensated by <sup>longwave</sup> radiation outgoing into space. The increase in greenhouse gases, especially CO<sub>2</sub>, <sup>has disrupted</sup> is throwing the system out of balance. The equation for the global energy balance can be formulated as follows:

$$N = F - \lambda T \quad (1)$$

where  $N$  is the Earth's heat uptake, [ $W/m^2$ ],  $F$  is a forcing dependent on the anthropogenic greenhouse gases concentration in the atmosphere, [ $W/m^2$ ],  $\lambda$  is the climate feedback parameter, [ $W/m^2/K$ ], and  $T$  is the global temperature change relative to equilibrium [ $K$ ]. Since the heat capacity of the land is negligible compared to the heat capacity of the ocean on annual time scales (Palmer and McNeall, 2014), the heat uptake could be interpreted solely as the heat uptake of the ocean (Gregory et al., 2024). The processes of oceanic heat uptake, mainly the warming of the mixed layer of the ocean and the transfer of heat to the deep ocean by convection and diffusion, are similar to the processes of inorganic oceanic carbon uptake (Seferian et al., 2024).





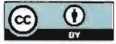

45 The recently explored link between ocean warming and carbon uptake indicates a strong role of the Southern Ocean in the ocean carbon uptake (Williams et al., 2024; Bourgeois et al., 2022). In this study, we use the flat10 experiments to simplify the global dynamics and avoid going into such regional analyses. Winkler *et al.* (2024) showed that there is pathway-independent linear relationship between land and ocean carbon uptake in emission-driven simulations using the MPI Earth system model (MPI-ESM; Mauritsen et al., 2019). We generalize this empirical relationship and use it to simplify the energy budget model (Eq. 1) in such a way that it could be solved analytically or numerically, <sup>↑ and</sup> then use the example of one model, MPI-ESM, to show how this approach could be applied to idealized experiments. We also use this simplified approach for the ramp-down trajectory of MPI-ESM and discuss our results. Afterwards, we apply this approach to some other flat10MIP FSMs and discuss analytical and numerical solutions for the airborne fraction of carbon emissions. Finally, we compare flat10MIP and C4MIP results and hypothesize about the dependence of idealized climate-carbon dynamics on CO<sub>2</sub> emission pathways.

→ ramp down trajectory of a scenario, I suppose, not the MPI model

## 55 2 Linking carbon cycle with ocean heat uptake

In differential equation form for the change in the ocean heat content (OHC)  $H$ , [J], Eq. 1 could be written as

$$\frac{dH}{dt} = F - \lambda T$$

suggest using  $\Delta T$  instead of  $T$ , and  $H$  represents ocean heat content

integrating this

$$H(t) = H(0) + \int_0^t (F(t') - \lambda \Delta T(t')) dt'$$

with initial conditions  $H(0) \Delta T(0) = 0$ .

represent

For the carbon cycle variables  $C_a$ ,  $C_o$ , and  $C_l$  of anthropogenic carbon content of the atmosphere, ocean, and land respectively, [PgC], the initial values are zeroes (pre-industrial equilibrium). Annual carbon emissions in the initial 100 years of flat10 experiments are prescribed at a constant rate of  $E = 10$  PgC/yr (Sanderson et al., 2024a, b). For the flat10MIP analysis (Sanderson et al., 2024b), most of the models show a linear relationship between cumulative land and ocean uptakes (Fig. 1):

suggest using  $\Delta C_a$ ,  $\Delta C_l$ ,  $\Delta C_o$

$$C_l(t) = (k - 1)C_o(t).$$

It's not obvious why a -1 after k. Can u pls explain the rationale? (3)

This linear relationship was also observed in a study using MPI-ESM and different idealized emission pathways (Winkler et al., 2024).

The ratios of land to ocean carbon uptakes,  $C_l/C_o$ , in the flat10 experiments are similar to the ratios  $\beta_l/\beta_o$  of the carbon-concentration feedback parameters as well as to the  $C_l/C_o$  ratios at the 2xCO<sub>2</sub> level in the C4MIP experiments of CMIP6 (Tab. 1). This similarity is expected, as the carbon-concentration feedback parameters  $\beta_l$  and  $\beta_o$  reflect an increase of land and ocean carbon pools, respectively, in response to atmospheric CO<sub>2</sub> changes. However, the linearity of the  $C_l/C_o$  ratio for the range of emissions from 0 to 1000 PgC is unexpected. Although processes that govern land and ocean carbon uptakes are different, the link between them could be explained by increasing atmospheric CO<sub>2</sub> concentration which is a primary forcing for both land and ocean carbon uptakes. We can apply this empirical relationship to simplify the description of carbon cycle dynamics, in particular for MPI-ESM (Fig. 3, left). Additionally, for simplicity one can assume a linear relationship between ocean heat and carbon uptake, as the processes of dissolution and transport of CO<sub>2</sub> into the deep ocean are generally similar to the transport of heat (Fig. 2, Fig. 3, right):

$$C_o(t) = \eta H(t),$$

using  $\Delta$ s will really help

$$\Delta C_o = \eta \Delta H(t); \quad \Delta H(t) = H(t) - H(0)$$

3



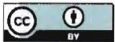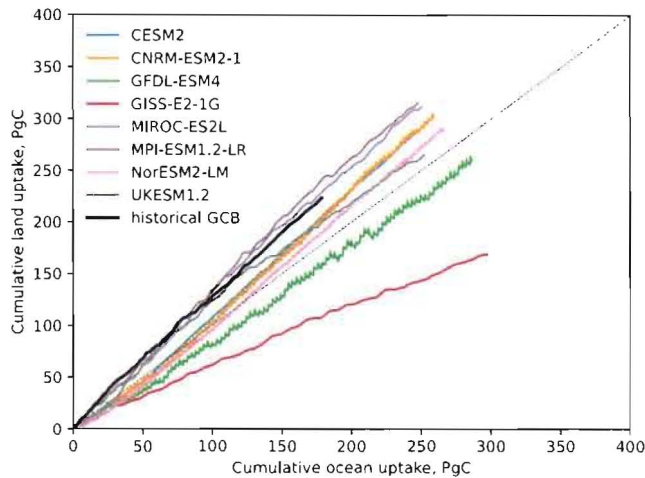

**Figure 1.** Cumulative land vs ocean carbon uptakes in the flat10 experiments for the first 100 years. Historical land vs ocean carbon sinks provided by the Global Carbon Project (Friedlingstein et al., 2023) for the period 1850-2022 are shown by continuous black line. Note that land fluxes do not account for land use changes. The thin dash line is the 1:1 ratio.

| Model         | $C_l/C_o$ , flat10 | $\beta_l/\beta_o$ | $C_l/C_o$ , C4MIP |
|---------------|--------------------|-------------------|-------------------|
| CESM2         | 1.17               | 1.17              | 1.08              |
| CNRM-ESM2-1   | 1.17               | 1.69              | 1.36              |
| GFDL-ESM4     | 0.90               | 1.11              | 0.88              |
| GISS-E2-1G    | 0.57               | 0.8*              | 0.96*             |
| MIROC-ES2L    | 1.24               | 1.71              | 1.41              |
| MPI-ESM1.2-LR | 1.27               | 1.23              | 1.33              |
| NorESM2-LM    | 1.09               | 1.07              | 1.03              |
| UKESM1.2      | 1.05               | 1.14              | 0.98              |

**Table 1.** Parameters of flat10 ESMs. Left,  $C_l/C_o = k - 1$ , the ratio of cumulative land to ocean carbon uptakes by the year 100. For comparison with C4MIP experiments at the 2xCO<sub>2</sub> level (Arora et al., 2020): middle, ratio of  $\beta_l$  to  $\beta_o$ ; right, a ratio of cumulative land to ocean carbon uptake. \*GISS model results are based on slightly older version of GISS-ESM.

where the units of  $\eta$  are [PgC/J]. Note that the ocean carbon sink saturates with rising CO<sub>2</sub> concentration and warming, therefore a non-linear logarithmic relationship between carbon and heat uptake might fit better (Fig. 2), but for simplicity we use the linear relationship (Eq. 4) thus allowing us to find an analytical solution of the coupled climate-carbon system.

80 For the atmospheric carbon content, carbon conservation can be written as:

$$C_a = Et - C_l - C_o = Et - kC_o = Et - k\eta H \tag{5}$$

suggest using  
 $\int E(t) \cdot dt = E_{cum}$

Pls make it clear  
historical obs have LUC  
and flat10 doesn't. Also make  
it clear if you added  
LUC emissions to  $\Delta C_L$  for  
historical GCB numbers.  
Since  $\Delta C_L + \Delta C_o + \Delta C_a$  still  
need to add up to  
FF + LUC emissions.

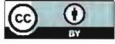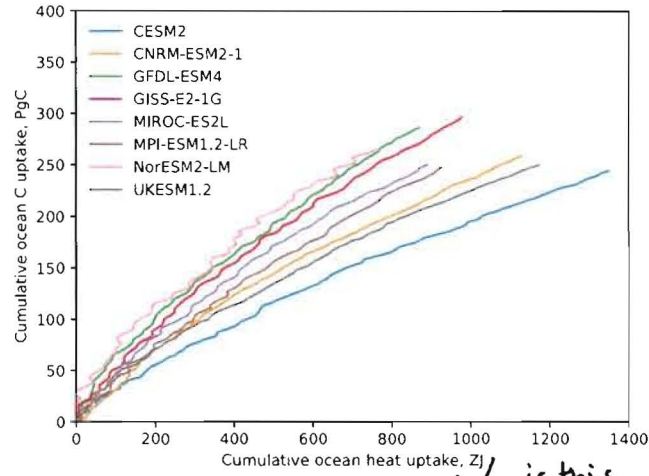

is this zeta joules?

**Figure 2.** Analogous to Figure 1: Changes in cumulative ocean carbon and heat uptakes in the flat10 experiments.

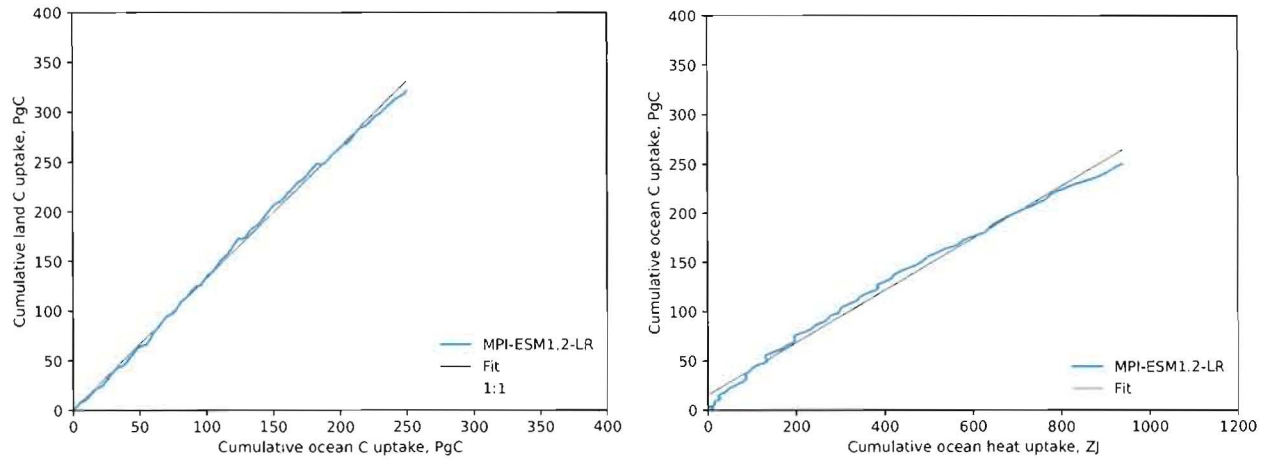

**Figure 3.** Results of the flat10 experiment with MPI-ESM1.2-LR (blue lines). Left: dynamics of cumulative land vs ocean carbon uptakes. Right: changes in cumulative ocean carbon and heat uptakes. Black lines are for linear fits.

where  $E t$  are the cumulative carbon emissions. The derivative of  $C_a$  is then

$$\frac{dC_a}{dt} = E - k\eta \frac{dH}{dt}. \quad (6)$$

From the Eq. (2), it follows

$$85 \quad \frac{dC_a}{dt} = E - k\eta(F - \lambda T). \quad (7)$$



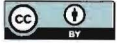

The Eq. (7), where left and right parts are functions of atmospheric CO<sub>2</sub> and time, reduces the coupled temperature-CO<sub>2</sub> system to just one differential equation. This is the novelty of our approach.

## 2.1 Analytical solution for dynamical *climate-carbon system with all linear approximations*

We assume that the forcing  $F$  is linearly proportional to the CO<sub>2</sub> concentration,  $F = rC_a$ , where  $r$  is a constant [ $W/m^2/PgC$ ], and that temperature is growing linearly with time as a consequence of constant TCRE (Transient Climate Response to cumulative CO<sub>2</sub> Emissions; Canadell et al., 2021). Accordingly,  $T = \zeta Et$ , where  $\zeta = TCRE$  [ $K/PgC$ ], and we can write

$$\frac{dC_a}{dt} = E - k\eta r C_a + k\eta \lambda \zeta Et = E(1 + k\eta \lambda \zeta t) - k\eta r C_a \quad (8)$$

By renaming constants and writing  $x$  instead of  $C_a$ , this differential equation can be written in the form

$$\frac{dx}{dt} = k_1 + k_2 t + k_3 x \quad (9)$$

where  $k_i, i = 1, 2, 3$  are constants. By substituting the variable  $x$  to  $u = k_1 + k_2 t + k_3 x$ , Eq. (9) can be written as

$$\frac{du}{dt} = k_2 + k_3 u \quad (10)$$

and solved analytically. The solution for the coupled  $C_a$  and  $T$  system is

$$C_a(t) = E \left( \frac{\lambda \zeta}{r} t + \frac{(r - \lambda \zeta)}{r^2 k \eta} (1 - e^{-k\eta r t}) \right) \quad (11)$$

and

$$T(t) = \zeta Et. \quad (12)$$

By renaming constants  $\varphi_0 = \frac{\lambda \zeta}{r}$ ,  $\tau_l = \frac{(r - \lambda \zeta)}{r^2 k \eta}$ ,  $\tau_e = \frac{1}{k\eta r}$ , Eq. (11) can be written as

$$C_a(t) = Et \left( \varphi_0 + \frac{\tau_l}{t} (1 - e^{-t/\tau_e}) \right) = Et \varphi(t), \quad (13)$$

where  $\varphi(t) = \varphi_0 + \frac{\tau_l}{t} (1 - e^{-t/\tau_e})$  is the airborne fraction of cumulative CO<sub>2</sub> emissions,  $\varphi_0$  is the asymptotic airborne fraction,  $\tau_l$  and  $\tau_e$  are, respectively, linear and exponential time scales of the exponential component of the airborne fraction, [ $yr$ ].

Values of parameters  $\varphi_0$ ,  $\tau_l$  and  $\tau_e$  for ESMs are given in the Table 2.

According to Eq. (13), the cumulative airborne CO<sub>2</sub> fraction,  $\varphi(t)$  includes two terms. The first term  $\varphi_0$  is a constant, and the second term  $\frac{\tau_l}{t} (1 - e^{-t/\tau_e})$  is time-dependent. Because the later term is proportional to  $\frac{1}{t}$ , it decreases with time, therefore, the cumulative airborne fraction  $\varphi(t)$  also decreases with time. The instantaneous airborne fraction  $\varphi_i$  can be written as

$$\varphi_i(t) = \frac{dC_a}{dt} \frac{1}{E} = \varphi_0 + \frac{\tau_l}{\tau_e} e^{-t/\tau_e} \quad (14)$$

Because the exponential term  $e^{-t/\tau_e}$  is decreasing with time, the instantaneous airborne fraction also decreases with time approaching  $\varphi_0$  (Fig. 4, left). The land and ocean carbon storages can be written as

$$C_l(t) = \frac{k-1}{k} (Et - C_a) \quad (15)$$



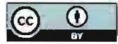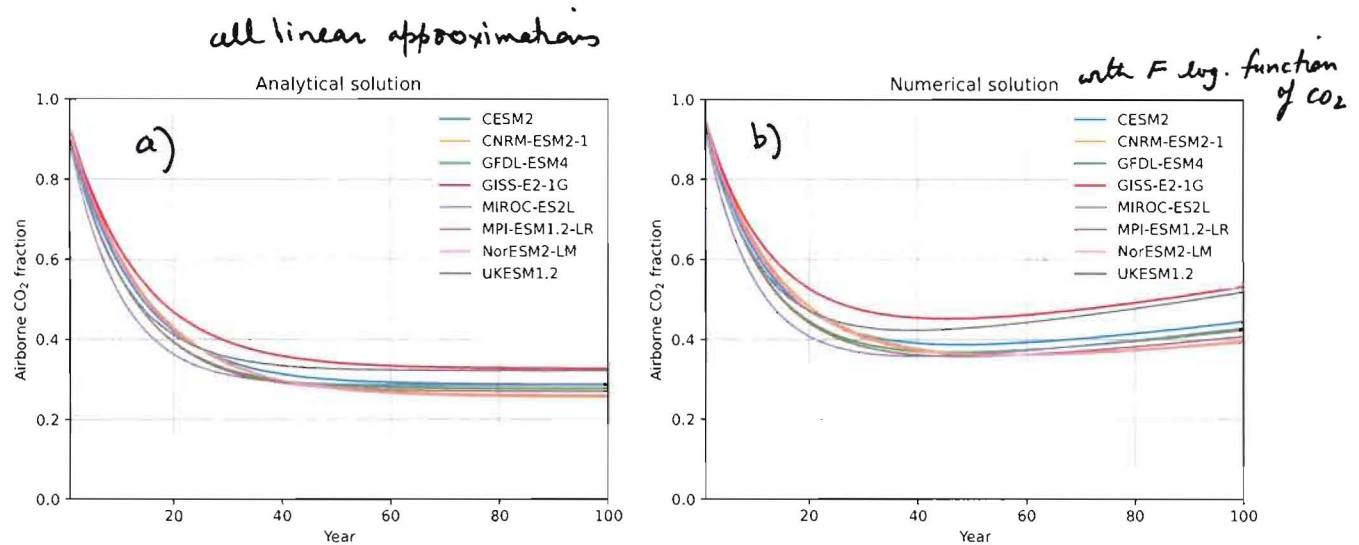

**Figure 4.** Instantaneous CO<sub>2</sub> airborne fraction in the analytical (left) and numerical (right) solutions for flat10 ESMs

and

$$C_o(t) = \frac{1}{k} (Et - C_a),$$

*AF calculated from actual flat10 simulations* (16)

115 and the derivative of atmospheric CO<sub>2</sub> with respect to temperature:

$$\frac{dC_a}{dT} = \frac{dC_a}{dt} \frac{dt}{dT} = \frac{\lambda}{r} + \frac{(r - \lambda\zeta)}{r\lambda} C^{-k\eta r t}. \quad (17)$$

These results can be used to understand the dynamics of carbon feedback parameters.

## 2.2 *OK* Numerical solution with forcing a logarithmic function of CO<sub>2</sub>

120 The assumption that the forcing  $F$  is linearly proportional to the CO<sub>2</sub> concentration,  $F = rC_a$ , is only valid for small changes in CO<sub>2</sub>. More correctly, a logarithmic dependence  $F = r \ln(1 + \frac{C_a}{C_a^0})$ , where  $C_a^0$  is pre-industrial atmospheric CO<sub>2</sub> storage, leads to an equation in the form:

$$\frac{dx}{dt} = k_1 + k_2 t + k_3 \ln(1 + x) \quad (18)$$

which does not have an analytical solution.

The equation for atmospheric CO<sub>2</sub> concentration:

$$125 \quad \frac{dC_a}{dt} = E - k\eta r \ln(1 + \frac{C_a}{C_a^0}) + k\eta \lambda \zeta Et \quad (19)$$

can be solved using a numerical approach. Equations (15) and (4) provide solutions for carbon and heat variables, respectively. Accounting for the logarithmic dependence of the forcing on CO<sub>2</sub> results in much better agreement with the MPI-ESM simulation (see Fig. 5, left). The cumulative airborne CO<sub>2</sub> fraction is decreasing until about year 40 for MPI-ESM and then starts

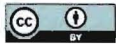

to increase slowly (Fig. 4, right). This is different from the airborne CO<sub>2</sub> fraction of the analytical solution that continues to  
 130 decline (Fig. 4, left). Results of the analytical and numerical solutions for several other flat10 ESMs are presented on the Fig.  
 6.

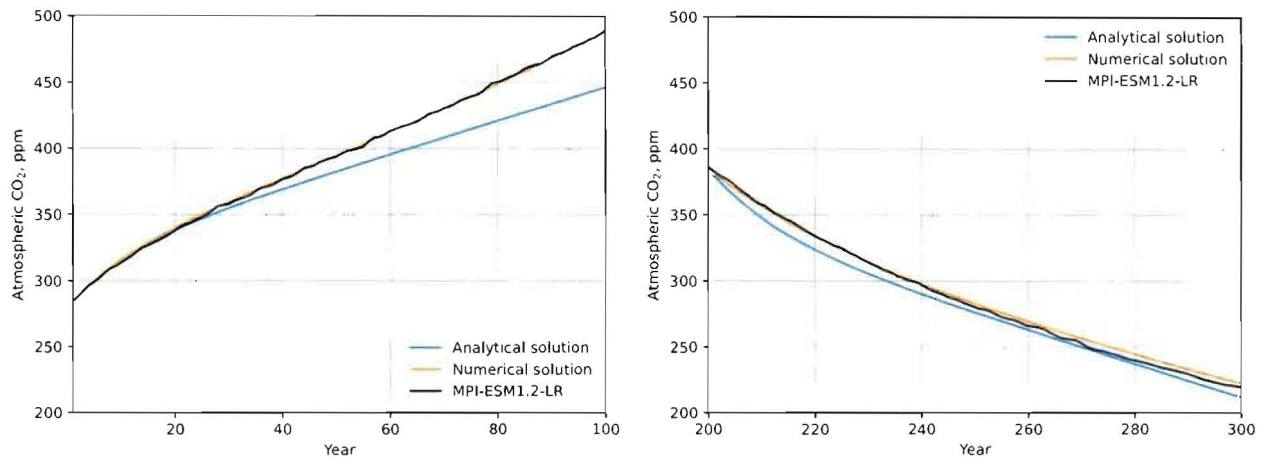

**Figure 5.** Atmospheric CO<sub>2</sub> concentration in the flat10 (left) and flat10cdr (right) experiments with MPI-ESM (black). Blue and orange lines are for analytical and numerical solutions, respectively.

| Model         | $\varphi_0 = \zeta \lambda / r$ | $\tau_l$ , [yr] | $\tau_e$ , [yr] |
|---------------|---------------------------------|-----------------|-----------------|
| CESM2         | 0.29                            | 8.6             | 12.1            |
| CNRM-ESM2-1   | 0.26                            | 10.6            | 14.2            |
| GFDL-ESM4     | 0.28                            | 8.2             | 11.3            |
| GISS-E2-1G    | 0.33                            | 8.9             | 13.3            |
| MIROC-ES2L    | 0.29                            | 6.7             | 9.3             |
| MPI-ESM1.2-LR | 0.27                            | 8.4             | 11.6            |
| NorESM2-LM    | 0.26                            | 10.0            | 13.6            |
| UKESM1.2      | 0.32                            | 6.9             | 10.2            |

**Table 2.** Parameters of airborne fraction of atmospheric CO<sub>2</sub> for flat10 ESMs. Left,  $\varphi_0$ , an asymptotical airborne fraction; middle,  $\tau_l$ , linear airborne timescale; right,  $\tau_e$ , exponential airborne timescale.

### 2.3 Ramp-down flat10cdr experiments

Beyond 100 years of flat10 simulations (ramp-up), the flat10MIP experiments also included flat10cdr simulations for a further  
 200 years aiming to assess time scales and hysteresis in climate and carbon variables. The flat10cdr scenario included a  
 135 linear decrease in emissions from +10 to -10 PgC per year over 100 years and constant -10 PgC emissions (removed from

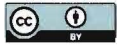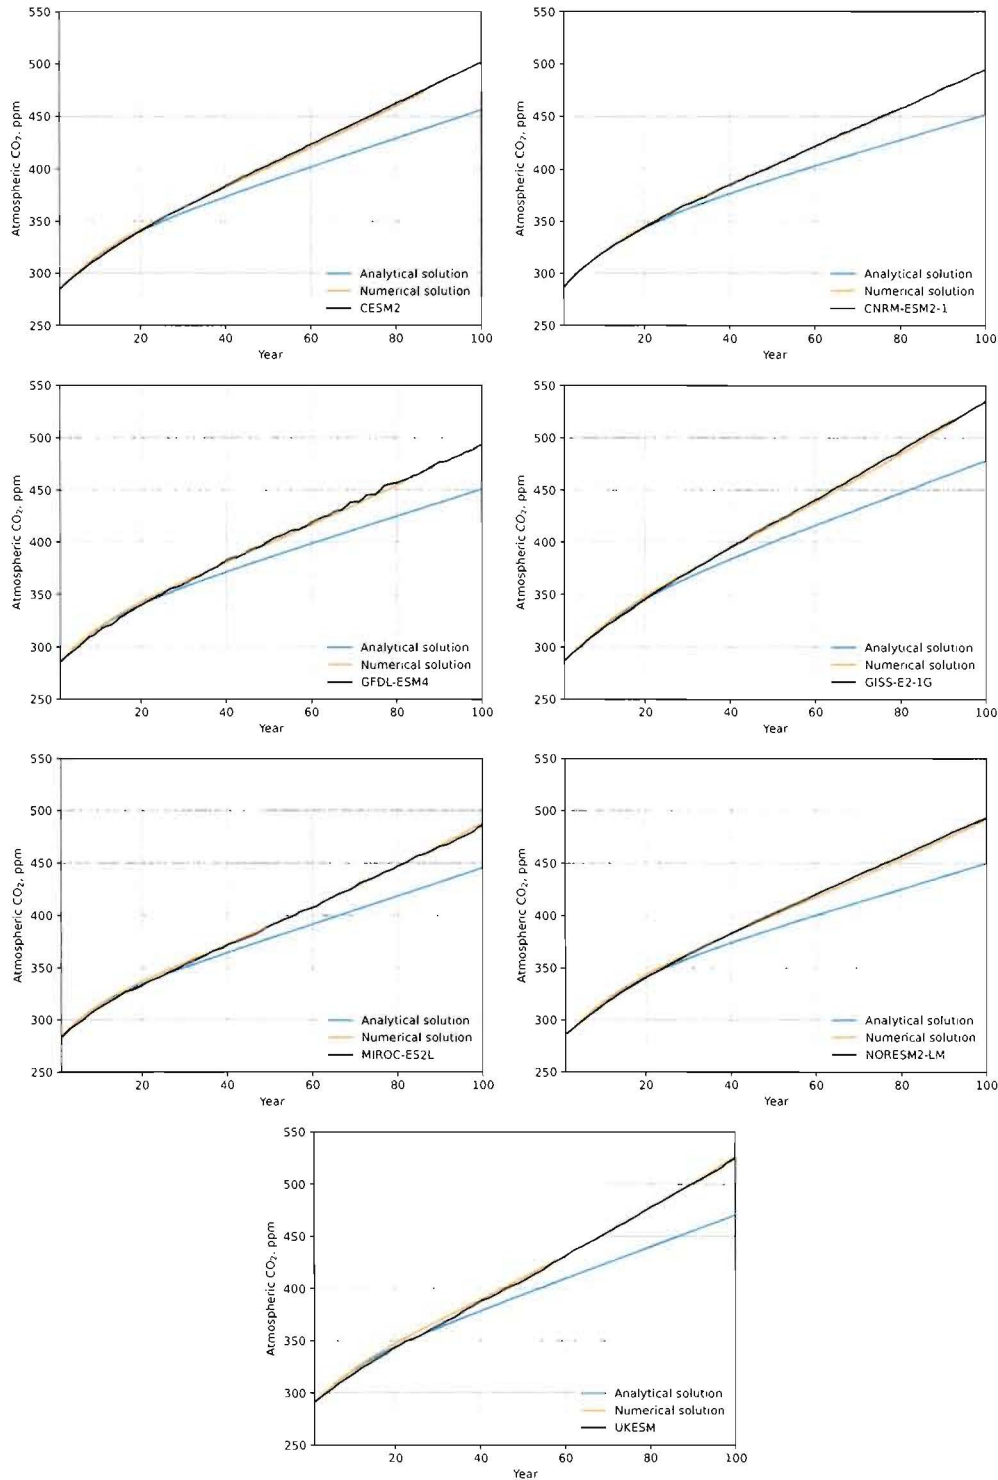

**Figure 6.** Atmospheric CO<sub>2</sub> concentration in the flat10 experiment with ESMs (black) and model results (blue - analytical, orange - numerical solution).

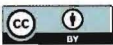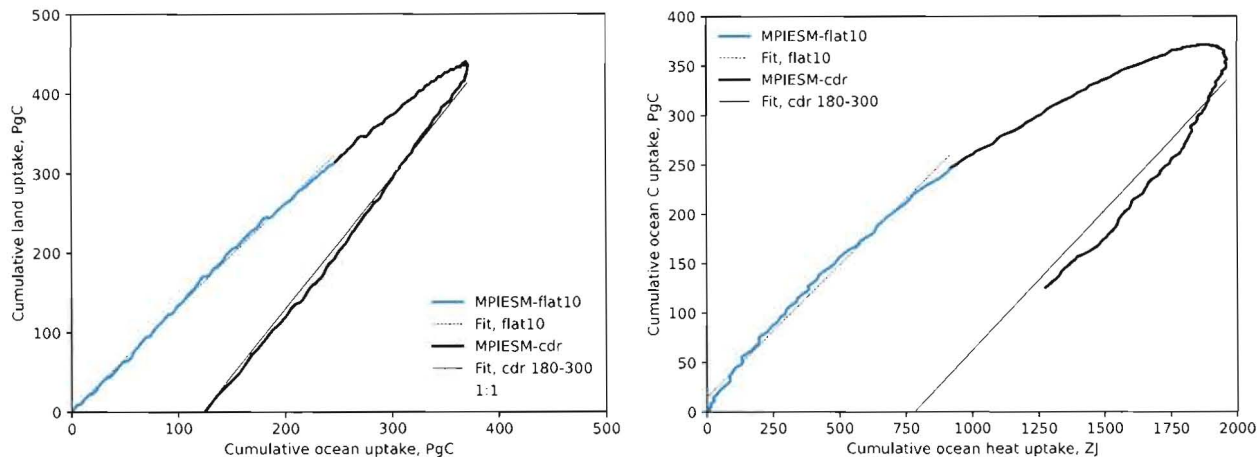

**Figure 7.** Cumulative land to ocean carbon uptakes (left) and ocean carbon to heat uptakes (right) in the flat10 and flat10cdr experiments with MPI-ESM1.2-LR. Gray lines are linear fits for the corresponding simulations.

| Model         | $k-1 = C_l/C_o$ | $\eta = C_o/OHC$ [PgC/ZJ] | $\zeta = TCRE$ [K/EgC] | $\lambda$ [W/m <sup>2</sup> /K] | linear | log   |
|---------------|-----------------|---------------------------|------------------------|---------------------------------|--------|-------|
|               |                 |                           |                        |                                 | $r^2$  | $r^2$ |
| CESM2         | 1.17            | 0.18 (0.27)               | 1.8                    | 0.63 (1.42)                     |        |       |
| CNRM-ESM2-1   | 1.17            | 0.23                      | 1.72                   | 0.74 (1.32)                     |        |       |
| GISS-E2-1G    | 0.57            | 0.3 (0.34)                | 1.62                   | 1.46 (1.82)                     |        |       |
| GFDL-ESM4     | 0.9             | 0.33                      | 1.45                   | 0.82 (1.7)                      |        |       |
| MIROC-ES2L    | 1.24            | 0.28 (0.34)               | 1.3                    | 1.54 (1.95)                     |        |       |
| MPI-ESM1.2-LR | 1.27            | 0.27                      | 1.5                    | 1.6                             |        |       |
| NorESM2-LM    | 1.09            | 0.29 (0.25)               | 1.4                    | 1.65                            |        |       |
| UKESM1.2      | 1.05            | 0.21 (0.34)               | 2.45                   | 0.67 (1.17)                     |        |       |

**Table 3.** Parameters based on flat10 experiments:  $C_l/C_o$ , the ratio of cumulative land to ocean carbon uptake (yr 100);  $C_o/OHC$ , the ratio of cumulative ocean carbon to heat uptake, PgC/ZJ (yr 100); TCRE, K/EgC (yr 100); and  $\lambda$  from 4xCO<sub>2</sub> experiments (Zelinka et al., 2020). Numbers in parentheses are adjusted parameters for analytical and numerical solutions.

the atmosphere) over the next 100 years (ramp-down trajectory). The results for carbon and heat uptake for the MPI-ESM are shown in the Fig. 7. The ramp-down dynamics are quasi-linear for both the carbon variables and the ocean heat content, although the statistical significance of fits is lower than for the ramp-up curve. With the simplified approach (Eqs. 9-18), modified parameters and initial conditions, we are able to simulate the atmospheric CO<sub>2</sub> trajectory for the last 100 years of the flat10cdr experiment quite well (Fig. 5, right). This indicates that the dynamics with constant negative emissions could be simplified in a similar way to the path with positive emissions.

It would be helpful to see ramp-up and ramp down parameters side by side

Is does the approach capable of capturing the time when emissions go from +10 to -10 .



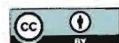

→ Actually as I see it flat10 provides a way to evaluate your framework. flat10 framework is not necessary to derive your analytical model.

### 3 Discussion

The analysis of the idealized flat10 experiments reveals a simplified formulation of the coupled climate-carbon dynamics. In particular, the linear relationship between the cumulative carbon uptake of land and ocean is a remarkable feature of the dynamics of the global carbon cycle, independent of the emission pathway (Winkler et al., 2024). Except for that recent study, it has not been discussed in previous publications examining idealized CO<sub>2</sub> experiments. Interestingly,  $C_l/C_o$  dynamics are also linear in experiments with a 1% annual increase in CO<sub>2</sub> concentration (Arora et al., 2020) up to a CO<sub>2</sub> concentration of about 2xCO<sub>2</sub> (Fig. A1, left). The  $C_l/C_o$  ratio in emission-driven flat10 experiments and concentration-driven C4MIP experiments is very similar (Table 1). This indicates that the  $C_l/C_o$  ratio only weakly dependent on idealized emission scenarios and that  $C_l/C_o$  does not differ significantly between concentration- and emission-driven simulations. The study by Winkler et al. (2024) confirmed this for the MPI-ESM model (see Fig. A2). Since we did not perform a full set of simulations with different idealized scenarios, we cannot prove this for all models, but formulate these results as a set of hypotheses:

- Hypothesis I:  $C_l/C_o$  does not differ between idealized emission scenarios,
- Hypothesis II:  $C_l/C_o$  does not differ significantly between concentration- and emission-driven idealized simulations.

There are clear limits to the validity of these hypotheses. Firstly, they are based on simulations spanning only a 100 year period (for some models, longer simulations are provided). Secondly, the linear relationship is known to hold for most models up to emissions of at least 1000 PgC or a CO<sub>2</sub> concentration of about 560 ppmv. At higher CO<sub>2</sub> concentrations, carbon uptake on land in some models increases more slowly or even decline compared to ocean uptake (Sanderson et al., 2024b),  $C_l/C_o$  decreases or reverses, and the relationship becomes non-linear (Fig. A1, right) as also reported by Winkler et al. (2024) for different pathways. This non-linear behavior usually emerges at high atmospheric CO<sub>2</sub> (and temperature) level, potentially due to saturation in CO<sub>2</sub> fertilization- or nutrient limitation-associated vegetation growth (Arora et al., 2020; Tjiputra et al., 2025; Kou-Giesbrecht et al., 2025).

An exception is the ACCESS model, one of the flat10 and C4MIP models, which shows no linear relationship after about 30 years of experimentation (Fig. A3). The saturation in cumulative land carbon uptake in the ACCESS model is partly due to a relative increase in heterotrophic respiration ( $R_h$ ) in response to temperature, which has a delayed impact due to large carbon pool turnover times. Also, temperature might be limiting carbon uptake in the tropics because optimal temperature for photosynthesis is exceeded and productivity therefore declines, while  $R_h$  is increasing. These non-linear dynamics deviate from the historical trajectory of the global carbon budget (Friedlingstein et al., 2023) indicated by black lines on the Fig. A3. Therefore, we excluded this model from our analysis of climate-carbon dynamics. It is noteworthy that the trajectories of the ACCESS model are very similar for concentration- and emission-driven experiments (Fig. A3). This fact supports hypotheses I and II.

The quasi-linear  $C_l/C_o$  relationship allows a simplified analysis of the energy budget of the system. The relationship between ocean carbon and ocean heat uptake is less linear, but a linear assumption helps to simplify the coupled energy and carbon dynamics. For MPI-ESM, the simplified approach with parameters from the flat10 and 4xCO<sub>2</sub> experiments (used for

→ Do we have a reference to support this. Also CABLE model in ACCESS has N but also P controls.

→ despite ACCESS behaving differently than other models

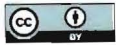

*was this discussed earlier.  
This is new information.*

175 determining the climate feedback) leads to a very good fit of the atmospheric CO<sub>2</sub> concentration (Fig. 5). For the other models, a good fit to the atmospheric CO<sub>2</sub> concentrations (Fig. 6) requires an adjustment of the climate feedback parameters, mostly towards higher values (Table 3). This possible mismatch could be explained by the non-linearity of the relationship between carbon and heat in the ocean and/or by the higher values of the climate feedbacks for the first years of the 4xCO<sub>2</sub> experiment (Zelinka et al., 2020).

*New info*

180 The airborne CO<sub>2</sub> fraction in the analytical solution decreases over time (and with increasing emissions) until it stabilizes at a certain level (Fig. 4, left). This behavior sounds counterintuitive, as feedback analysis of the climate-CO<sub>2</sub> relationship (Friedlingstein et al., 2006; Mendonca et al., 2024) suggests that the airborne fraction should increase and not decrease with increased emissions and temperatures. Under the analytical assumptions, however, this makes sense: with a linearly increasing CO<sub>2</sub> forcing, heat uptake increases, leading to increased carbon uptake in the ocean and on land. However, since the radiative forcing depends logarithmically on CO<sub>2</sub>, the proportion of CO<sub>2</sub> left in the air initially decreases in the simulations, and then increases after 30-50 years in all ESMs (Fig. 4, right). It is interesting to note that this non-linearity in the dependence of radiative forcing on CO<sub>2</sub> leads to lower carbon uptake in the ocean and on land than the linear dependence of radiative forcing.

190 The main mechanisms of carbon uptake on land are CO<sub>2</sub> fertilization of plant productivity (which increases logarithmically with increasing CO<sub>2</sub> concentration) and heterotrophic or soil respiration (which increases exponentially with increasing soil temperature). The net effect is an increase in carbon uptake with elevated CO<sub>2</sub>, with a tendency for land carbon uptake to slow as warming progresses (Canadell et al., 2021). There are also other less significant processes such as disturbances and shifts in vegetation distribution that affect carbon changes on land. For example, Winkler et al. (2024) demonstrated that vegetation dynamics lead to an additional increase in forest carbon storage.

*But these processes are unknown to the analytical model. So how does AF increase in Fig 4 (right)?*

In the ocean, CO<sub>2</sub> uptake is mainly determined by the CO<sub>2</sub> pressure difference between the atmosphere and the surface water and by the diffusion/removal of dissolved inorganic carbon (DIC) into the permanent thermocline. With increased temperature and elevated DIC concentration, the CO<sub>2</sub> solubility in sea water decreases and ocean uptake slows down. Changes in marine biology also affect carbon uptake, but to a lesser extent (Williams et al., 2020; Seferian et al., 2024; Tjiputra et al., 2025).

*TP* An implication of the linear relationship between cumulative land and ocean uptakes (Fig. 1) is that mechanisms either don't change much, or slow at the same rate for ocean and land. This is consistent with the notion that global rates of heat and carbon uptake by the ocean are primarily set by the background, or unperturbed, ocean circulation (Armour et al., 2016; Bronselaer and Zanna, 2020). This might help explain why the relation between cumulative heat and carbon uptake is scenario-independent in MPI-ESM (Fig. A2), as future rates of heat and carbon uptake are largely unaffected by changes in the ocean circulation. Whether or not ocean dynamical adjustments can break this linearity over longer timescales merits further analysis but is beyond the scope of this paper.

## 205 4 Conclusions

The relationship between cumulative carbon uptake on land and in the ocean,  $C_l/C_o$ , is model-specific and nearly linear in flat10 simulations until it reaches twice the pre-industrial CO<sub>2</sub> concentration. Comparison of emission-driven flat10MIP and



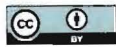

? why the word "natural" here?

210 concentration-driven C4MIP simulations shows that the  $C_l/C_o$  relationship is the same regardless of whether atmospheric  $\text{CO}_2$  is prescribed or interactive. Experiments with different Earth system models suggest that this relationship is also independent of the emission pathways. Therefore, we have formulated the hypothesis that the relationship  $C_l/C_o$  is independent of the natural carbon cycle models used in each ESM. The validity of this hypothesis is subject to certain limitations, in particular the linearity does not work well for  $\text{CO}_2$  concentrations above twice the pre-industrial  $\text{CO}_2$  level. A further limitation arises from the hundred-year duration of the flat10 simulations, as adjustments in the deep ocean on a time scale of 500-1000 years will significantly alter the carbon cycle and the temperature response.

215 We also found a relationship between ocean heat and carbon uptake in idealized simulations that allows for a simplification of the coupled climate-carbon dynamics. This approach links the atmospheric  $\text{CO}_2$  concentration to the ocean heat uptake and allows a reduction of the dynamical system to fewer dimensions. The simplified approach is valid for both ramp-up and ramp-down experiments.

An analysis of the airborne  $\text{CO}_2$  fraction in the analytical and numerical solutions revealed an important explanation for the linearity of the TCRE. If the radiative forcing were linearly dependent on the atmospheric  $\text{CO}_2$  concentration, the airborne fraction would stabilize at a certain level. The realistic, logarithmic dependence of the radiative forcing on the  $\text{CO}_2$  concentration leads to the airborne fraction increasing after 30-40 years of emissions. With increasing atmospheric  $\text{CO}_2$  level, the weakening  $\text{CO}_2$  radiative forcing is therefore compensated by an increasing airborne  $\text{CO}_2$  fraction, which leads to an almost constant temperature increase per unit of emissions or constant TCRE.

variables?

based on linear approach and one using all log dependence of F on  $\text{CO}_2$

225 **Code availability.** All code to reproduce plots in this study is permanently available at: <https://doi.org/10.5281/zenodo.15838467>

this can be brought out in the main text a bit better

**Data availability.** All data to reproduce this study is included at: <https://doi.org/10.5281/zenodo.15838467>

## Appendix A

For comparison with the flat10 experiments, the results of the C4MIP simulations are shown in Figs. A1 and A3. Notations and parameter units are listed in the Table A1.

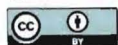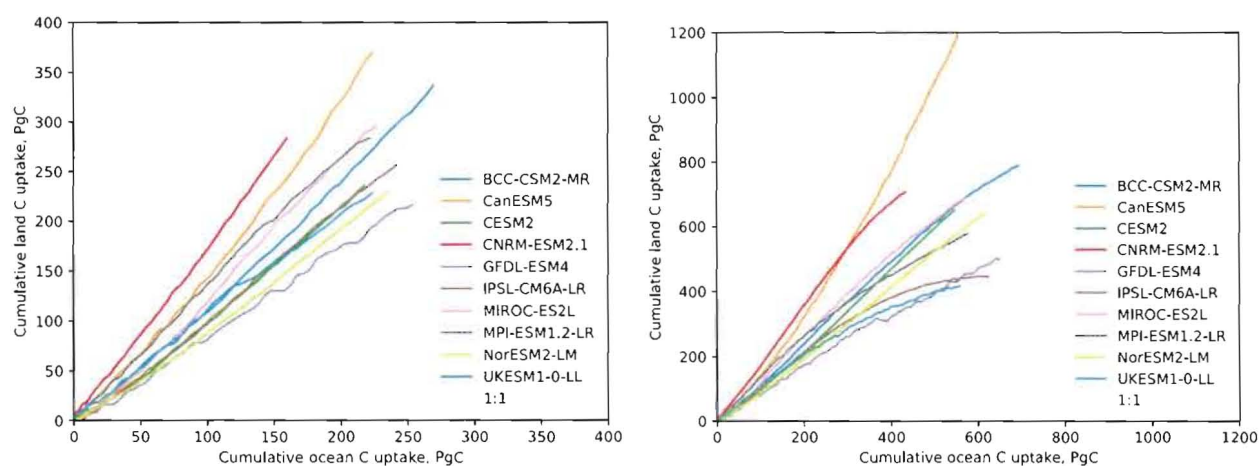

**Figure A1.** Cumulative land vs cumulative ocean carbon uptake in the C4MIP experiments for  $2\times\text{CO}_2$  (left) and  $4\times\text{CO}_2$  levels (right), data from Arora et al. (2020)
